# Supplementary material for: Enhanced water stability and high CO2 storage capacity of a Lewis basic sites-containing zirconium metal–organic framework
Source: Royal Society of Chemistry journal article supplement (doi:10.1039/d1dt02772g), 2021-01-01
Supplement: d1dt02772g1.pdf [file d1dt02772g1.pdf]

Electronic Supplementary Information

**Enhanced water stability and high CO<sub>2</sub> storage capacity of a Lewis basic sites-containing zirconium metal-organic framework**

Selçuk Demir,<sup>a,\*</sup> Nuray Bilgin,<sup>a</sup> Hamide Merve Cepni,<sup>a</sup> Hiroyasu Furukawa,<sup>b</sup> Fatih Yilmaz,<sup>a</sup>  
Cigdem Altintas,<sup>c</sup> and Seda Keskin<sup>c</sup>

<sup>a</sup> Recep Tayyip Erdoğan University, Faculty of Arts and Sciences, Department of Chemistry, 53100, Rize, Turkey.

<sup>b</sup> Department of Chemistry, University of California-Berkeley, Berkeley, CA 94720, USA.

<sup>c</sup> Department of Chemical and Biological Engineering, Koc University, Istanbul, Turkey.

\*To whom correspondence should be addressed. Email: selcuk.demir@erdogan.edu.tr

**Table of Contents**

|                                              |     |
|----------------------------------------------|-----|
| 1. Experimental details for linker synthesis | S2  |
| 2. Characterization of the MOFs              | S4  |
| 3. Setup for humid gas stream                | S10 |

## 1. Experimental details for linker synthesis

### Synthesis of 6,6'-dimethyl-2,2'-bipyridine-5,5'-dicarboxylic acid, (Me<sub>2</sub>bipyH<sub>2</sub>)

Ethyl 2-methylnicotinate (ethyl 2-methylpyridine-3-carboxylate) (4.0 g, 23 mmol) refluxed under nitrogen atmosphere at 180 °C for six days employing 5% Pd/C (0.1 g) as a catalyst with a magnetic stirrer. The formed colorless crystals dissolved in acetone and separated from Pd/C. The solution was evaporated under vacuum and corresponding product, diethyl 6,6'-dimethyl-[2,2'-bipyridine]-5,5'-dicarboxylate obtained. The obtained ester (0.090 g, 0.27 mmol) hydrolyzed in acetone-ethanol-water (1.5:1:1 v/v, 35 mL) containing NaOH (0.05 g) for 24 hours at room temperature. After the evaporation of ethanol and acetone, the solution was acidified by HCl until pH = 3. The formed H<sub>2</sub>Me<sub>2</sub>Bipy was purified using preparative thin layer chromatography plates. Yield is 25% based on ethyl 2-methylnicotinate. The reaction scheme and IR and NMR spectra were shown in Scheme S1 and Figs. S1-S2, respectively.

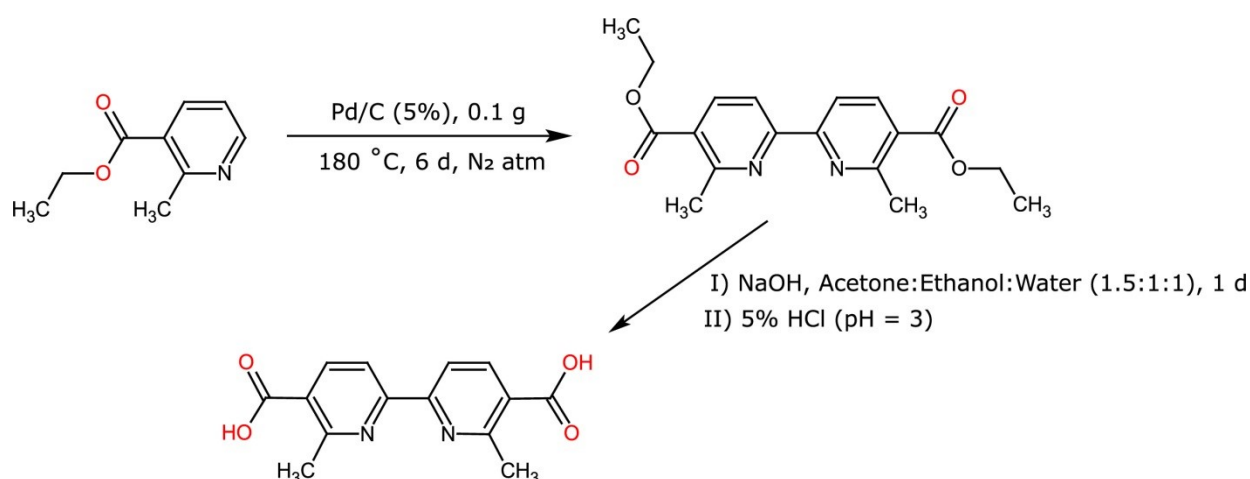

**Scheme S1.** Reaction scheme of H<sub>2</sub>Me<sub>2</sub>Bipy.

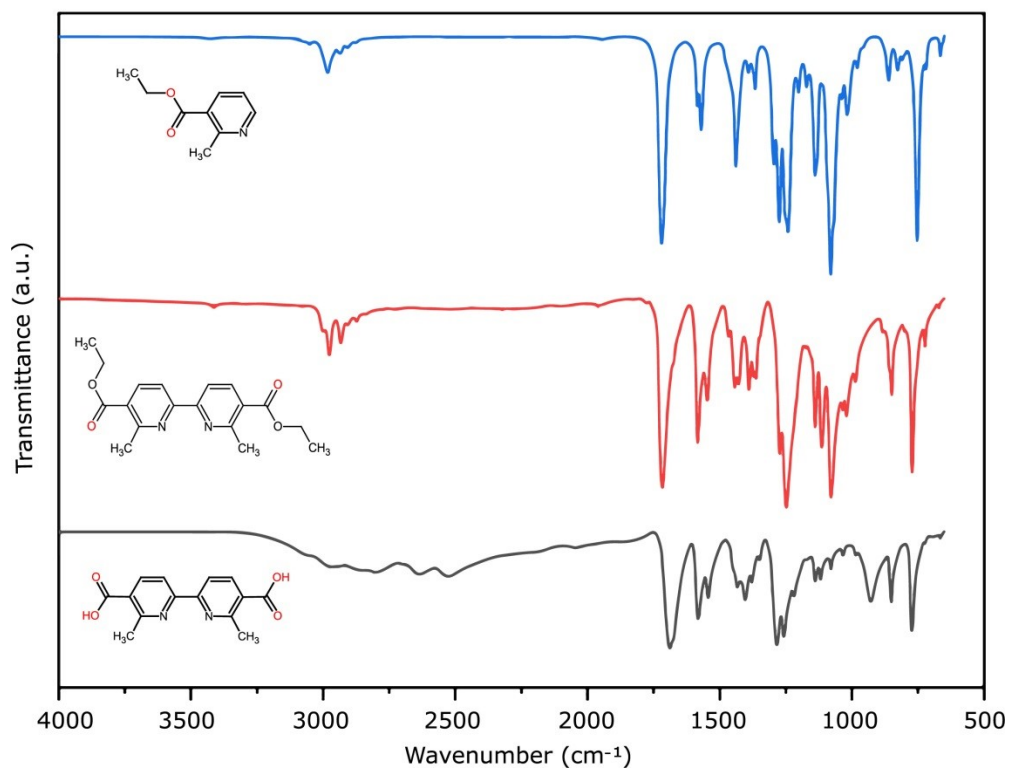

**Fig. S1** FTIR spectra of ethyl 2-methylnicotinate, di-ester, and H<sub>2</sub>Me<sub>2</sub>Bipy.

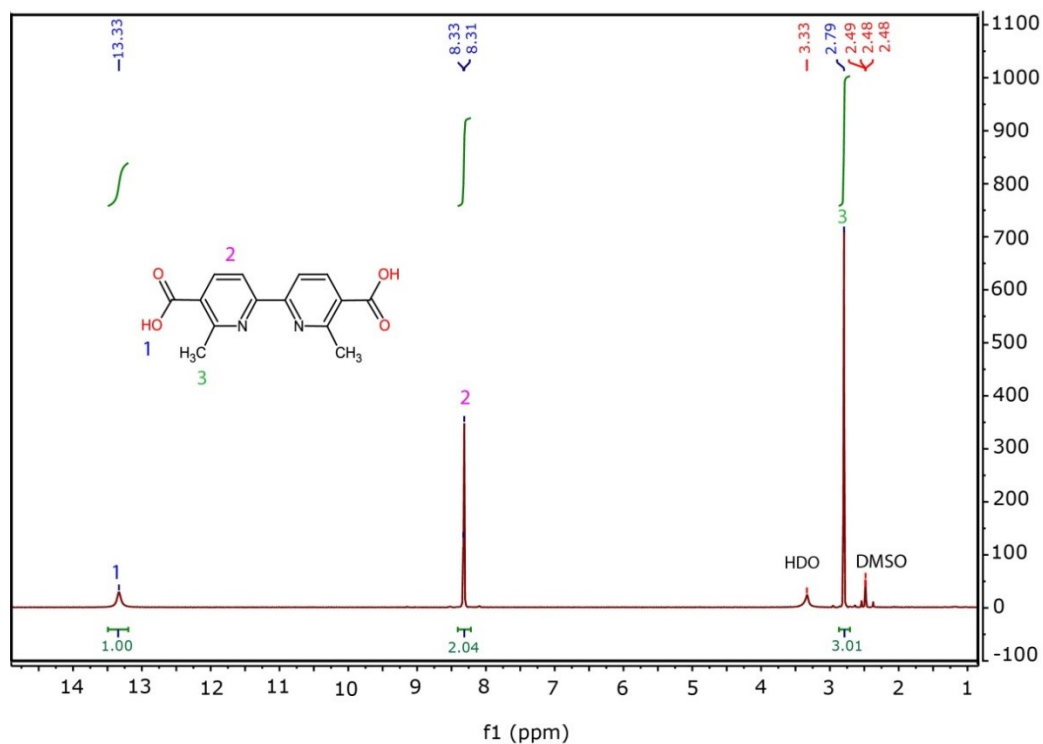

**Fig. S2** <sup>1</sup>H NMR spectrum of H<sub>2</sub>Me<sub>2</sub>Bipy.

## 2. Characterization of MOFs

Selected IR data for the compounds are summarized in Table S1. The IR spectra of the MOFs showed expected vibrations (Fig. S3). A broad band at *ca.* 3400  $\text{cm}^{-1}$  in the spectra of the MOFs is assigned to  $\nu(\text{OH})$  vibration of the unavoidable water molecules. The compounds exhibit two very strong bands at 1585  $\text{cm}^{-1}$  and 1400  $\text{cm}^{-1}$  region attributable to the  $\nu_{\text{asym}}(\text{COO}^-)$  and  $\nu_{\text{sym}}(\text{COO}^-)$ .

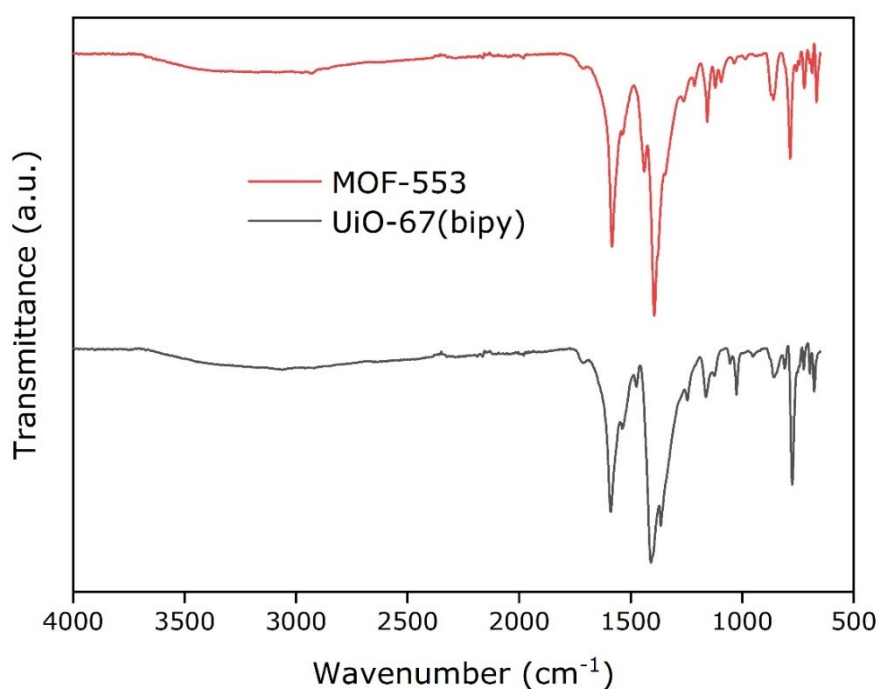

**Fig. S3** FTIR spectra of MOF-553 and UiO-67(bipy).

**Table S1** IR spectral data for MOFs and linker

| Compounds                          | $\nu(\text{CH})$ | $\nu(\text{C}=\text{O})$ | $\nu_{\text{asym}}(\text{COO}^-)$ | $\nu_{\text{sym}}(\text{COO}^-)$ |
|------------------------------------|------------------|--------------------------|-----------------------------------|----------------------------------|
| $\text{H}_2\text{Me}_2\text{Bipy}$ | 3075, 2900       | 1693 (COOH)              | -                                 | -                                |
| UiO-67(bipy)                       | 3061             | -                        | 1589 vs                           | 1409 vs                          |
| MOF-553                            | 3061, 2935       | -                        | 1583 vs                           | 1394 vs                          |

For the determination of unit cell dimensions, a microcrystalline sample of MOF-553 was gently ground and placed on a sample holder equipped with a zero-background Si plate. Powder X-ray diffraction (PXRD) data were collected during an overnight scan in the  $2\theta$  range of  $4\text{--}70^\circ$  with  $0.013^\circ$  steps using a Malvern Panalytical Empyrean diffractometer equipped with Cu -  $K_\alpha$  radiation ( $\lambda = 1.5418 \text{ \AA}$ ), a PIXcel1D detector with Medipix3, and mounting the following optics: Göbel mirror, fixed divergence slit (0.5 mm), receiving slit (3 mm), and secondary beam Soller slits ( $2.29^\circ$ ). The generator was set at 45 kV and 40 mA.

A standard peak search, followed by indexing via the single value decomposition approach,<sup>1</sup> as implemented in TOPAS-Academic,<sup>2</sup> allowed the determination of approximate unit cell dimensions. Precise unit cell dimensions were determined by performing a structureless Le Bail refinement in TOPAS-Academic.

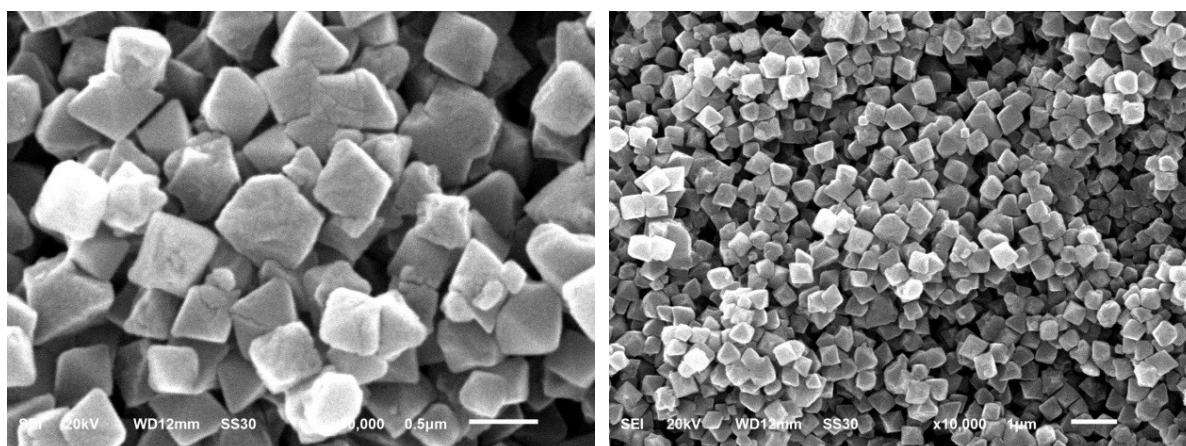

**Fig. S4** SEM images of MOF-553.

To evaluate the absence of the occluded molecules in the pores and thermal stability of MOF-553 and UiO-67(bipy), thermogravimetric analysis (TGA) measurement was performed under a dynamic air atmosphere. Weight losses at  $25\text{--}120^\circ\text{C}$  are attributed to occluded water molecules (physisorbed water) within the pores, which is unavoidable for most MOFs. In contrast, the drastic weight loss was observed after  $400^\circ\text{C}$ . Therefore, it can be concluded that the prepared materials are well activated and stable up to  $400^\circ\text{C}$ .

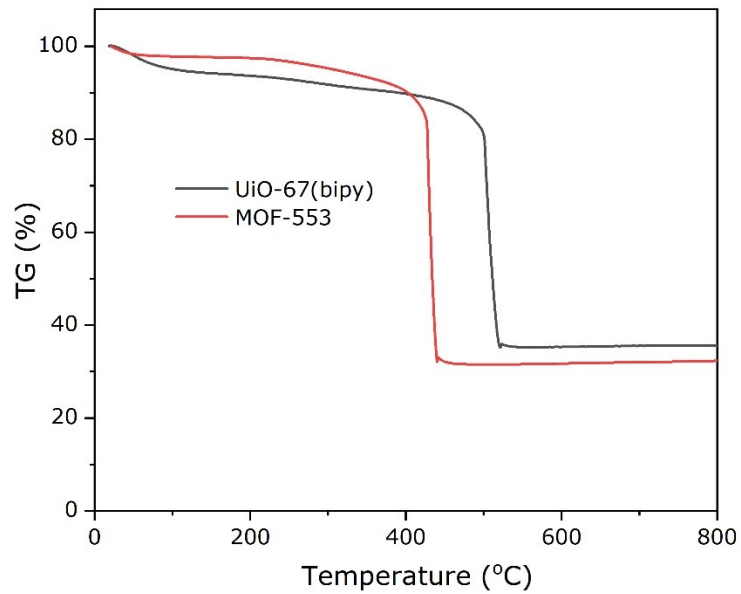

**Fig. S5** TGA curves of MOF-553 and UiO-67(bipy).

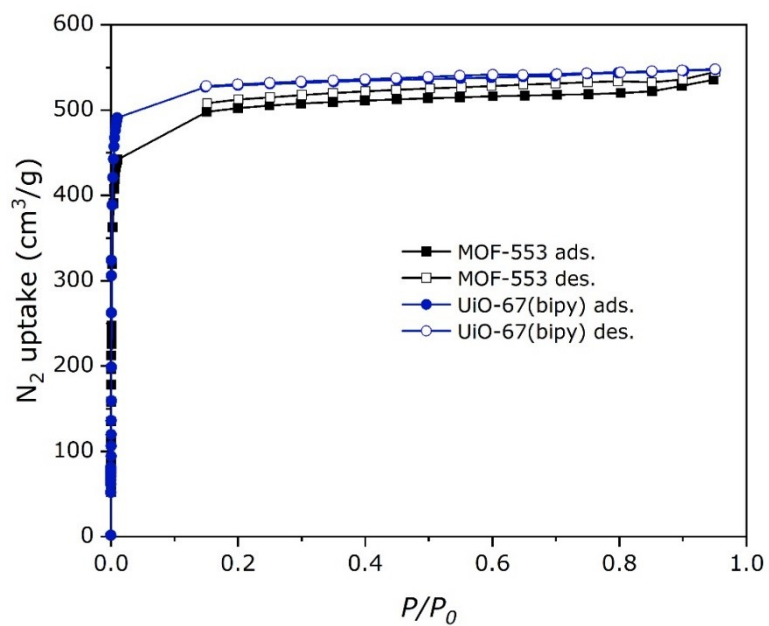

**Fig. S6** N<sub>2</sub> isotherms of MOF-553 and UiO-67(bipy) measured at 77 K.

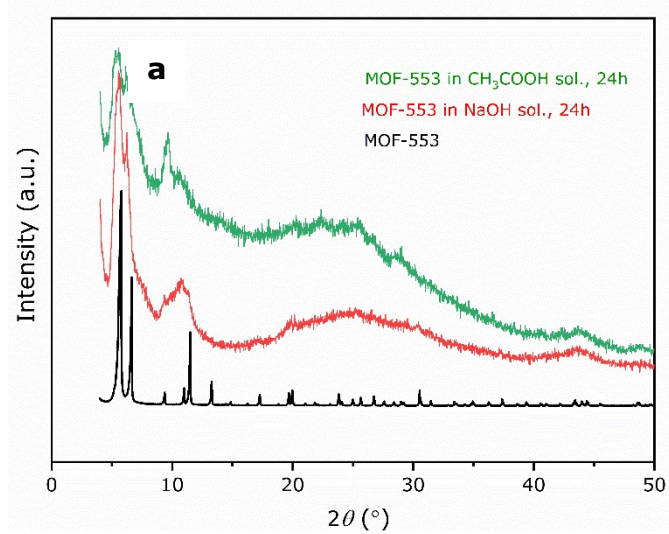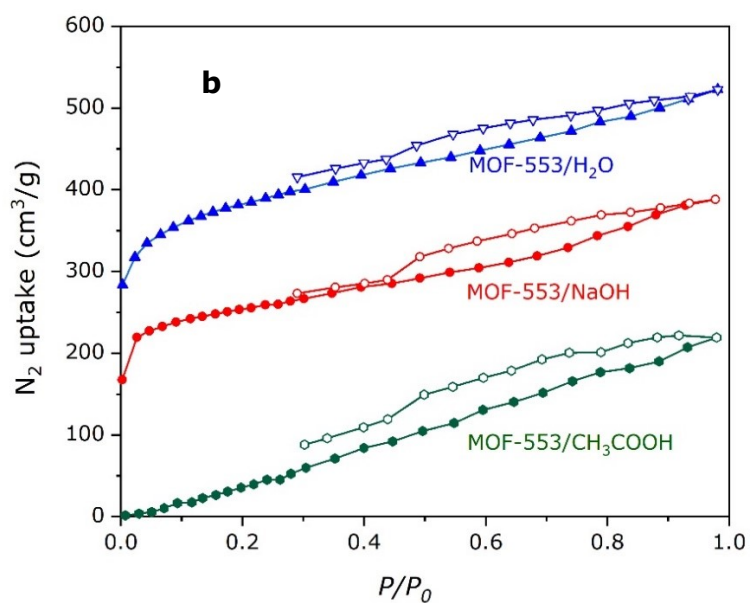

**Fig. S7 a)** PXR D patterns for MOF-553 (black), MOF-553 treated in  $\text{CH}_3\text{COOH}$  (green) and in NaOH solution (red); **b)** Adsorption-desorption isotherms of MOF-553/ $\text{H}_2\text{O}$ , MOF-553/NaOH, and MOF-553/ $\text{CH}_3\text{COOH}$  (adsorption: filled circles, desorption: empty circles)

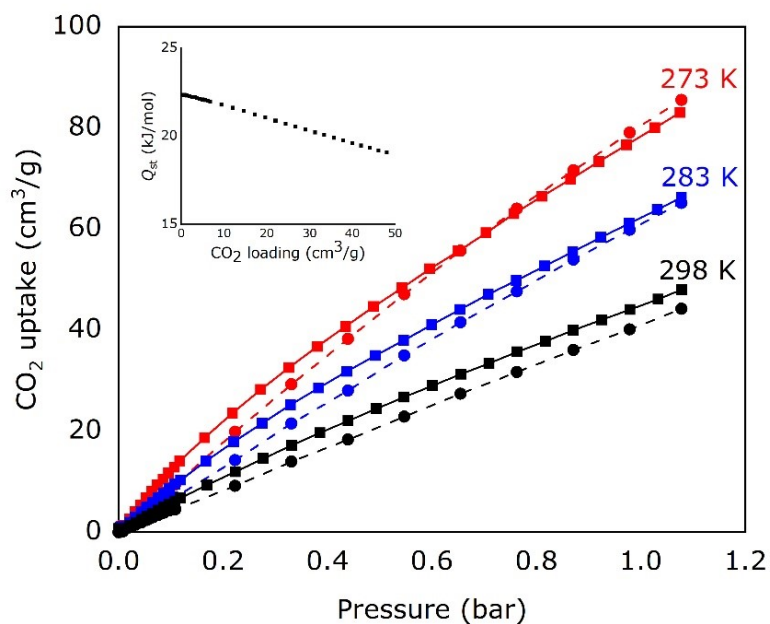

**Fig. S8** CO<sub>2</sub> adsorption isotherms and  $Q_{st}$  graph (inset) of MOF-553. Squares show the experimental data and circles represent the simulation results.

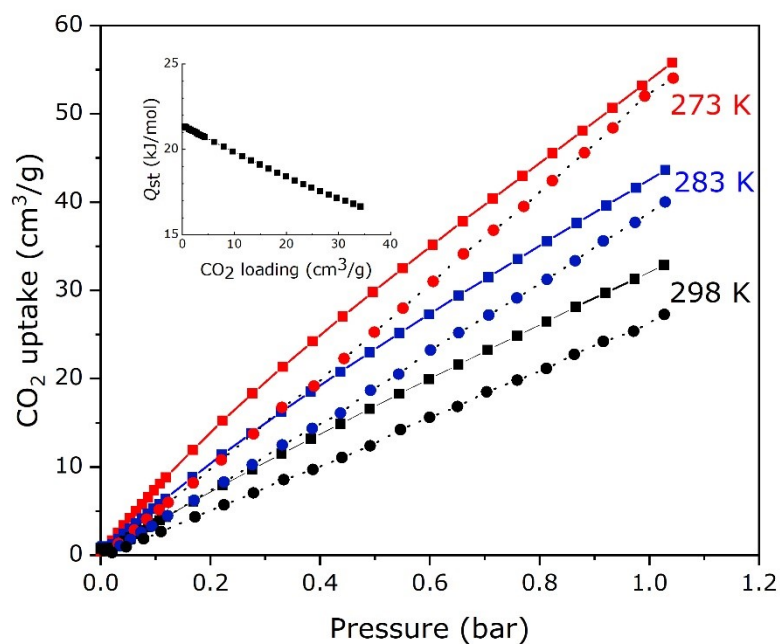

**Fig. S9** CO<sub>2</sub> adsorption isotherms and  $Q_{st}$  curve (inset) of UiO-67(bipy). Squares show the experimental data and circles represent the simulation results.



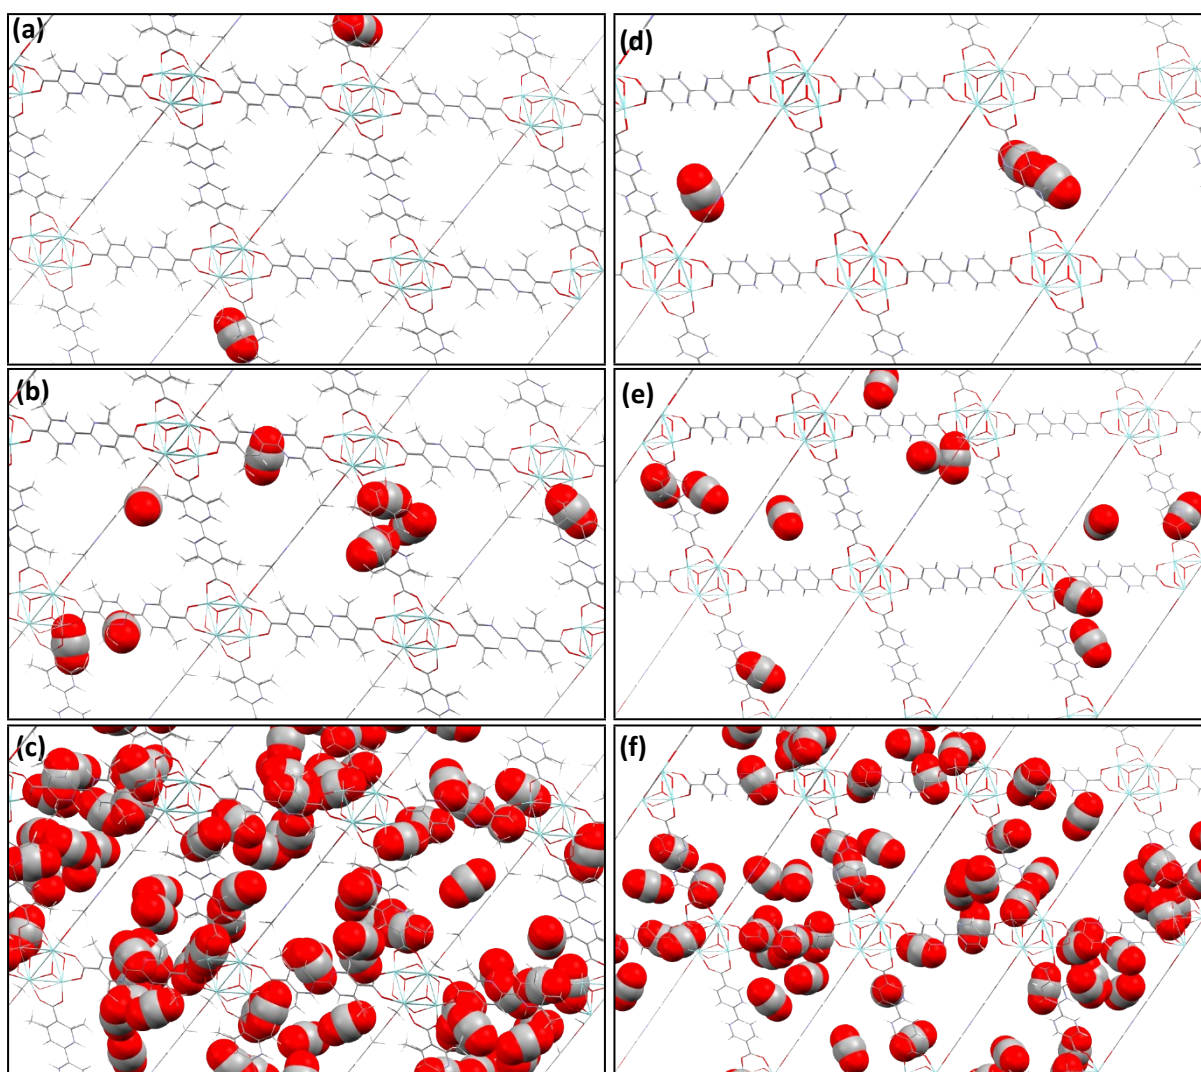

**Fig. S10** Zoom-in view of CO<sub>2</sub> adsorption sites obtained from GCMC simulations at 0.01, 0.1, and 1 bar for (a-c) MOF-553, (d-f) UiO-67(bipy).

### 3. Setup for humid gas stream

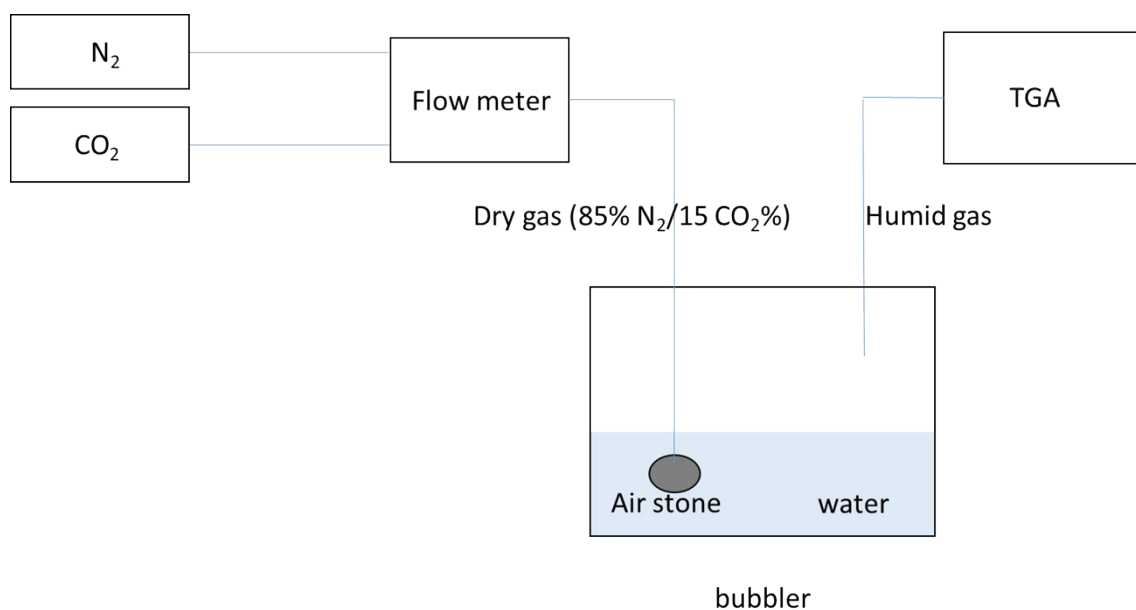

**Fig. S11** Set up for preparation of humid gas stream ( $N_2/CO_2 = 85/15$ ).

TGA results of dry  $N_2$  (pure  $N_2$ ), humid  $N_2$ , dry  $CO_2$  (pure  $CO_2$ ) and humid  $CO_2$  adsorption experiments on MOF-553 with or without water were shown in Fig. S12. Consistent with TGA, under dry  $N_2$  atmosphere the weight increase is rather small than pure and humid  $CO_2$  conditions. Thus we can conclude that MOF-553 adsorbs a small amount of  $N_2$  and  $H_2O+N_2$  at experimental conditions. Thus, it may be acceptable to neglect  $N_2$  co-adsorption in these multicomponent measurements. Under humid  $CO_2$  stream the mass of MOF-553 is increased (3.5%) relative to the dry  $CO_2$  (2.0%). Therefore, the weight difference between the dry and humid  $CO_2$  experiments should primarily be due to water adsorption. The water content is estimated to be 1.5% at 38 °C by comparison of dry and humid  $CO_2$  gas results on TGA, and it is comparable with the results of Long *et al.*<sup>3</sup> which reported as 1.3%. Please note that Fig. S12 is recorded under binary gas mixtures and Fig. 6 is recorded under flue gas conditions and the uptake amount subject to change as verified via simulations.

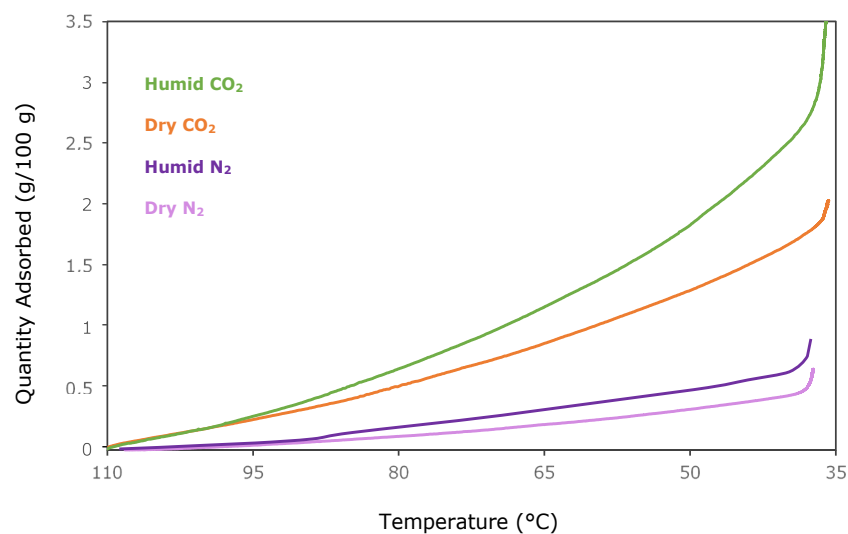

**Fig. S12** TGA results of pure and binary gas uptake obtained employing the prepared set up (Fig. S11) (dry N<sub>2</sub>: pure N<sub>2</sub>; humid N<sub>2</sub>: N<sub>2</sub>+H<sub>2</sub>O; dry CO<sub>2</sub>: pure CO<sub>2</sub>; humid CO<sub>2</sub>: CO<sub>2</sub>+H<sub>2</sub>O).

## References

- 1 A. Coelho, *J. Appl. Cryst.*, 2003, **36**, 86-95.
- 2 A. Coelho, TOPAS-Academic, Version 4.1, Coelho Software, Brisbane, 2007.
- 3 P.J. Milner, R.L. Siegelman, A.C. Forse, M.I. Gonzalez, T. Runčevski, J.D. Martell, J.A. Reimer, and J.R. Long, *J. Am. Chem. Soc.* 2017, **139**, 13541–13553.
